# Supplementary material
Source: PubMed Central journal article supplement (PMC8259698)
Supplement: NIHMS1710854-supplement-Supplementary_Material.pdf [file NIHMS1710854-supplement-Supplementary_Material.pdf]

## Short-Term Suicide Risk Following Psychiatric Hospital Discharge

### Supplementary Material

Supplemental Table 1: Cohort selection among inpatients who were 18 to 64 years of age

Supplemental Table 2: Background characteristics of adult Medicaid inpatients with a principal diagnosis of depression, bipolar disorder, schizophrenia, substance use, or no mental disorder

Supplemental Table 3: Suicide during the 90 days following hospital discharge of adult inpatients in the Medicaid program by presence of primary mental disorder diagnosis and age group

Supplemental Table 4: Short-term risk of suicide of adult inpatients in the Medicaid program with a first-listed mental disorder

Supplemental Table 5: Suicide rates of adult inpatients in the Medicaid program by number of outpatient health visits in the 180 days before hospital admission, during the first 90 days following hospital discharge

Appendix (Diagnostic Codes)

| Supplemental Table 1: Cohort selection among inpatients who were 18 to 64 years of age                                                                           |                                 |                                  |
|------------------------------------------------------------------------------------------------------------------------------------------------------------------|---------------------------------|----------------------------------|
| Eligibility criterion                                                                                                                                            | Any Mental Disorders Cohort (N) | Non-Mental Disorders Cohort (N)* |
| Initial sample                                                                                                                                                   | 1,163,328                       | 1,518,113                        |
| Eligible for Medicaid, 180 days prior to index admission                                                                                                         | 901,641                         | 1,128,441                        |
| Inpatient length of stay, 1 to 30 days                                                                                                                           | 890,451                         | 1,128,192                        |
| Discharged home, not an institutional setting                                                                                                                    | 770,643                         | 1,090,551                        |
| Study cohorts                                                                                                                                                    | 770,643                         | 1,090,551                        |
| Results based on 45-state 2001-2007 Medicaid MAX files. *10% random sample of inpatients with principal discharges other than mental disorders (ICD-9: 290-319). |                                 |                                  |

Supplemental Table 2: Background characteristics of adult Medicaid inpatients with a principal diagnosis of depression, bipolar disorder, schizophrenia, substance use, or no mental disorder

| Characteristic                           | Depressive Disorders<br>(N=193,620)<br>% | Bipolar Disorder<br>(N=109,139)<br>% | Schizophrenia<br>(N=173,810)<br>% | Substance Use Disorders<br>(N=185,064)<br>% | Other Mental Disorders<br>(N=109,010)<br>% | Non-Mental Disorders<br>(N=1,090,551)<br>% |
|------------------------------------------|------------------------------------------|--------------------------------------|-----------------------------------|---------------------------------------------|--------------------------------------------|--------------------------------------------|
| Age, years                               |                                          |                                      |                                   |                                             |                                            |                                            |
| 18-34                                    | 39.7                                     | 41.0                                 | 30.8                              | 26.9                                        | 44.8                                       | 64.9                                       |
| 35-44                                    | 28.7                                     | 29.6                                 | 30.0                              | 35.2                                        | 24.6                                       | 12.5                                       |
| 45-64                                    | 31.6                                     | 29.4                                 | 39.2                              | 37.8                                        | 30.6                                       | 22.5                                       |
| Sex                                      |                                          |                                      |                                   |                                             |                                            |                                            |
| Male                                     | 30.0                                     | 33.2                                 | 55.6                              | 57.8                                        | 41.5                                       | 14.6                                       |
| Female                                   | 70.0                                     | 66.8                                 | 44.4                              | 42.2                                        | 58.5                                       | 85.4                                       |
| Race/Ethnicity                           |                                          |                                      |                                   |                                             |                                            |                                            |
| White, non-Hispanic*                     | 67.9                                     | 76.5                                 | 56.6                              | 55.2                                        | 67.1                                       | 51.8                                       |
| Black, non-Hispanic                      | 22.0                                     | 17.4                                 | 36.2                              | 33.7                                        | 24.8                                       | 27.6                                       |
| Hispanic                                 | 10.0                                     | 6.1                                  | 7.3                               | 11.1                                        | 8.1                                        | 20.6                                       |
| Recent mental health treatment**         |                                          |                                      |                                   |                                             |                                            |                                            |
| Outpatient mental health diagnosis       |                                          |                                      |                                   |                                             |                                            |                                            |
| Depression                               | 44.4                                     | 28.1                                 | 16.2                              | 17.9                                        | 24.3                                       | 4.6                                        |
| Alcohol use disorder                     | 11.9                                     | 11.7                                 | 8.8                               | 30.9                                        | 9.3                                        | 2.2                                        |
| Drug use disorder                        | 6.4                                      | 6.4                                  | 4.2                               | 25.7                                        | 4.9                                        | 1.0                                        |
| Schizophrenia                            | 5.3                                      | 12.4                                 | 55.8                              | 4.5                                         | 9.6                                        | 0.9                                        |
| Bipolar disorder                         | 7.9                                      | 44.0                                 | 10.5                              | 5.5                                         | 9.1                                        | 1.0                                        |
| Anxiety disorder                         | 16.7                                     | 13.4                                 | 5.9                               | 9.7                                         | 14.7                                       | 2.2                                        |
| Other mental disorder                    | 19.7                                     | 22.8                                 | 22.0                              | 10.9                                        | 31.5                                       | 3.3                                        |
| Any deliberate self-harm                 | 1.9                                      | 1.4                                  | 0.5                               | 0.4                                         | 1.2                                        | 0.0                                        |
| Emergency mental health diagnosis        | 20.6                                     | 24.0                                 | 22.4                              | 18.4                                        | 19.9                                       | 1.1                                        |
| Inpatient, length of stay, days          |                                          |                                      |                                   |                                             |                                            |                                            |
| 1-4                                      | 40.3                                     | 29.4                                 | 18.8                              | 47.7                                        | 49.9                                       | 77.0                                       |
| 5-8                                      | 39.1                                     | 40.0                                 | 36.0                              | 36.4                                        | 30.5                                       | 16.9                                       |
| 9-30                                     | 20.6                                     | 30.6                                 | 45.3                              | 15.8                                        | 19.6                                       | 5.4                                        |
| No outpatient health care, past 180 days | 8.8                                      | 8.6                                  | 11.1                              | 12.3                                        | 10.3                                       | 6.7                                        |

\*Includes White, American Indian/Alaskan Native, Asian, Native Hawaiian/Other Pacific Islander, and more than one race

\*\*During 180 day period prior to inpatient admission

Supplemental Table 3: Suicide during the 90 days following hospital discharge of adult inpatients in the Medicaid program by presence of primary mental disorder diagnosis and age group

| Group                | Number of Discharges N | Person-years at risk Years | Suicides N | Suicide Rate (per 100,000 person-years) | Unadjusted Hazard Ratio of Suicide (95%CI) | Adjusted* Hazard Ratio of Suicide (95%CI) |
|----------------------|------------------------|----------------------------|------------|-----------------------------------------|--------------------------------------------|-------------------------------------------|
| Age, total           |                        |                            |            |                                         |                                            |                                           |
| Any mental disorder  | 770643                 | 189573.7                   | 338        | 178.3                                   | 15.43 (10.68, 22.28)                       | 10.61 (7.27, 15.48)                       |
| Non-mental disorder  | 1090551                | 268214.9                   | 31         | 11.6                                    | 1.00                                       | 1.00                                      |
| Age, 18-34 years     |                        |                            |            |                                         |                                            |                                           |
| Any mental disorder  | 273726                 | 67428.2                    | 90         | 133.5                                   | 46.59 (18.93, 114.65)                      | 21.44 (8.38, 54.83)                       |
| Non-mental disorder  | 708081                 | 174540.6                   | 5          | 2.9                                     | 1.00                                       | 1.00                                      |
| Age, 35-44 years     |                        |                            |            |                                         |                                            |                                           |
| Any mental disorder  | 232176                 | 57123.6                    | 109        | 190.8                                   | 7.13 (3.61, 14.06)                         | 5.71 (2.88, 11.34)                        |
| Non- mental disorder | 136703                 | 33605.1                    | 9          | 26.8                                    | 1.00                                       | 1.00                                      |
| Age, 45-64 years     |                        |                            |            |                                         |                                            |                                           |
| Any mental disorder  | 264741                 | 65021.9                    | 139        | 213.8                                   | 7.56 (4.57, 12.51)                         | 6.86 (4.13, 11.39)                        |
| Non-mental disorder  | 245767                 | 60069.2                    | 17         | 28.3                                    | 1.00                                       | 1.00                                      |

\*Adjusted for sex, race/ethnicity, and region.

| Supplemental Table 4: Short-term risk of suicide of adult inpatients in the Medicaid program with a first-listed mental disorder |                            |                            |                              |                     |
|----------------------------------------------------------------------------------------------------------------------------------|----------------------------|----------------------------|------------------------------|---------------------|
| Characteristic                                                                                                                   | Total Adjusted HR (95% CI) | Males Adjusted HR (95% CI) | Females Adjusted HR (95% CI) | Interaction P-value |
| Age, year                                                                                                                        |                            |                            |                              |                     |
| 18-34                                                                                                                            | 1.0                        | 1.0                        | 1.0                          | N/A                 |
| 35-44                                                                                                                            | <b>1.58 (1.19, 2.10)</b>   | 1.25 (0.87, 1.81)          | <b>2.28 (1.43, 3.62)</b>     | 0.05                |
| 45-64                                                                                                                            | <b>1.79 (1.36, 2.35)</b>   | <b>1.59 (1.13, 2.23)</b>   | <b>2.22 (1.40, 3.54)</b>     | 0.25                |
| Sex                                                                                                                              |                            |                            |                              | N/A                 |
| Male                                                                                                                             | <b>2.29 (1.82, 2.88)</b>   | N/A                        | N/A                          |                     |
| Female                                                                                                                           | 1.00                       | N/A                        | N/A                          |                     |
| Race/Ethnicity                                                                                                                   |                            |                            |                              |                     |
| White, non-Hispanic*                                                                                                             | <b>4.91 (3.22, 7.47)</b>   | <b>4.43 (2.68, 7.32)</b>   | <b>6.09 (2.83, 13.15)</b>    | 0.49                |
| Hispanic                                                                                                                         | <b>2.23 (1.16, 4.27)</b>   | 1.86 (0.82, 4.19)          | <b>3.16 (1.05, 9.50)</b>     | 0.49                |
| Black, non-Hispanic                                                                                                              | 1.00                       | 1.00                       | 1.00                         | N/A                 |
| Primary discharge diagnosis                                                                                                      |                            |                            |                              |                     |
| Depressive disorders                                                                                                             | <b>1.99 (1.41, 2.81)</b>   | <b>2.14 (1.40, 3.30)</b>   | 1.72 (0.96, 3.08)            | 0.64                |
| Bipolar                                                                                                                          | <b>1.65 (1.11, 2.45)</b>   | <b>1.72 (1.04, 2.86)</b>   | 1.46 (0.76, 2.80)            | 0.79                |
| Schizophrenia                                                                                                                    | 1.37 (0.94, 2.00)          | 1.43 (0.91, 2.25)          | 1.19 (0.58, 2.42)            | 0.75                |
| Substance use disorder                                                                                                           | 1.0                        | 1.0                        | 1.0                          | N/A                 |
| Other mental disorder                                                                                                            | 1.38 (0.91, 2.08)          | 1.35 (0.80, 2.28)          | 1.31 (0.66, 2.61)            | 0.98                |
| Number of outpatient mental health disorder groups**                                                                             |                            |                            |                              |                     |
| 0                                                                                                                                | 1.0                        | 1.0                        | 1.0                          | N/A                 |
| 1                                                                                                                                | 1.15 (0.82, 1.60)          | 1.17 (0.76, 1.79)          | 1.09 (0.64, 1.87)            | 0.83                |
| 2                                                                                                                                | <b>1.48 (1.04, 2.10)</b>   | 1.39 (0.88, 2.20)          | 1.57 (0.91, 2.71)            | 0.76                |
| 3                                                                                                                                | 1.39 (0.89, 2.18)          | 1.55 (0.88, 2.73)          | 1.16 (0.56, 2.41)            | 0.51                |
| ≥4                                                                                                                               | <b>1.92 (1.13, 3.25)</b>   | 1.64 (0.80, 3.36)          | <b>2.31 (1.05, 5.09)</b>     | 0.54                |
| Linear Trend Test: Chi-square (p-value)                                                                                          | 3.59 (0.06)                | 1.12 (0.29)                | 2.74 (0.10)                  |                     |
| Inpatient, length of stay, days                                                                                                  |                            |                            |                              |                     |
| 1-4                                                                                                                              | 1.13 (0.84, 1.52)          | 1.05 (0.72, 1.54)          | 1.25 (0.79, 1.99)            | 0.49                |
| 5-8                                                                                                                              | 0.99 (0.74, 1.33)          | 1.09 (0.76, 1.56)          | 0.85 (0.52, 1.38)            | 0.47                |
| 9-30                                                                                                                             | 1.0                        | 1.0                        | 1.0                          | N/A                 |
| No outpatient health care, past 180 days                                                                                         | <b>1.67 (1.11, 2.52)</b>   | 1.53 (0.92, 2.56)          | <b>2.02 (1.01, 4.03)</b>     | 0.56                |

HR denotes hazard ratios, CI denotes confidence interval. Adjusted HRs are from a single model that also controls for geographic region.  
 \*Includes White, American Indian/Alaskan Native, Asian, Native Hawaiian/Other Pacific Islander, and more than one race  
 \*\*180 days prior to hospital admission

Supplemental Table 5: Suicide rates of adult inpatients in the Medicaid program by number of outpatient health visits in the 180 days before hospital admission, during the first 90 days following hospital discharge

| Group                                              | Number of Discharges<br>N | Person-years at risk<br>Years | Suicides<br>N | Suicide Rate<br>(per 100,000 person-years) | Unadjusted Hazard Ratio of Suicide<br>(95%CI) | Adjusted* Hazard Ratio of Suicide (95%CI) |
|----------------------------------------------------|---------------------------|-------------------------------|---------------|--------------------------------------------|-----------------------------------------------|-------------------------------------------|
| Outpatient health care visits, past 180 days       |                           |                               |               |                                            |                                               |                                           |
| 0                                                  | 153211                    | 37691.6                       | 45            | 119.4                                      | 1.11 (0.76, 1.62)                             | 1.40 (0.94, 2.07)                         |
| 1-5                                                | 286531                    | 70513.9                       | 50            | 70.9                                       | 0.66 (0.46, 0.95)                             | 0.88 (0.61, 1.29)                         |
| 6-10                                               | 237982                    | 58584.4                       | 38            | 64.9                                       | 0.60 (0.41, 0.90)                             | 0.85 (0.56, 1.27)                         |
| 11-15                                              | 217741                    | 53603.6                       | 35            | 65.3                                       | 0.61 (0.40, 0.92)                             | 0.92 (0.61, 1.40)                         |
| 16-20                                              | 180409                    | 44416.4                       | 30            | 67.5                                       | 0.63 (0.41, 0.97)                             | 0.93 (0.60, 1.45)                         |
| 21-30                                              | 263174                    | 64778.7                       | 42            | 64.8                                       | 0.60 (0.41, 0.89)                             | 0.86 (0.58, 1.28)                         |
| 31-50                                              | 267833                    | 65884.3                       | 62            | 94.1                                       | 0.88 (0.62, 1.24)                             | 1.17 (0.82, 1.67)                         |
| >50                                                | 254313                    | 62315.7                       | 67            | 107.5                                      | 1.00                                          | 1.00                                      |
| Adjusted for age, sex, race/ethnicity, and region. |                           |                               |               |                                            |                                               |                                           |

| Appendix: Diagnostic Groups and ICD-9-CM Codes                                                                                                                                                                |                                                                            |
|---------------------------------------------------------------------------------------------------------------------------------------------------------------------------------------------------------------|----------------------------------------------------------------------------|
| <i>Diagnostic Group and Conditions</i>                                                                                                                                                                        | <i>ICD-9-Codes</i>                                                         |
| Depressive disorders                                                                                                                                                                                          | 296.2x, 296.3x, 296.82, 298.0, 300.4, 311                                  |
| Alcohol use disorders                                                                                                                                                                                         | 291, 303, 305                                                              |
| Drug use disorders                                                                                                                                                                                            | 292, 304                                                                   |
| Schizophrenia                                                                                                                                                                                                 | 295.00-295.99                                                              |
| Bipolar disorders                                                                                                                                                                                             | 296.0x, 296.1x, 296.4x, 296.5x, 296.6x, 296.7x, 296.8x (other than 296.82) |
| Anxiety Disorders                                                                                                                                                                                             | 300.0x, 300.2x, 300.3 308.3, 309.81                                        |
| Other mental disorders                                                                                                                                                                                        | 290-319 not included in other narrow diagnostic groups                     |
| Deliberate self-harm                                                                                                                                                                                          | E950-E959                                                                  |
| <p>Diagnostic groups define diagnostic categories used in Table 3 and Supplemental Table 2. Substance use disorders in all tables defined as combination of alcohol use disorders and drug use disorders.</p> |                                                                            |
